# Supplementary material
Source: publisher figshare collection journal article supplement (https://acs.figshare.com/ndownloader/files/5159710)
Supplement: Supplementary file 1 [file 5159710]

data_General
_publ_requested_journal          'Organic Letters'

#==============================================================================

# SUBMISSION DETAILS

_publ_contact_author_name        'Kohsuke Aikawa'
_publ_contact_author_email       kaikawa@o.cc.titech.ac.jp
_publ_contact_author_phone       (+81)3-5734-2776
_publ_contact_author_fax         (+81)3-5734-2776
loop_
_publ_author_name
_publ_author_address
'Mikami, Koichi'
;Department of Applied Chemistry
Graduate School of Science and Engineering
Tokyo Institute of Technology
Ookayama, Meguroku, Tokyo 152-8552 (Japan)
;
_audit_creation_date             2003-06-02
_audit_creation_method           'by CrystalStructure v3.16'
_audit_update_record             ?

#==============================================================================

# PROCESSING SUMMARY (IUCr Office Use Only)

_journal_date_recd_electronic    ?
_journal_date_from_coeditor      ?
_journal_date_accepted           ?
_journal_coeditor_code           ?
_publ_contact_letter
;
     ENTER TEXT OF LETTER
;
_publ_requested_category         'CHOOSE FI FM FO CI CM CO or AD'
_publ_requested_coeditor_name    ?

#==============================================================================

# TITLE AND AUTHOR LIST

_publ_section_title
;
     ENTER SECTION TITLE
;
_publ_section_title_footnote
;
     ENTER FOOTNOTE TO TITLE OF PAPER
;
loop_
_publ_author_footnote
;
   FIRST AUTHORS FOOTNOTES
;
_publ_section_synopsis
;
   ENTER SYNOPSIS
;

#==============================================================================

# TEXT

_publ_section_abstract
;
     ENTER ABSTRACT
;
_publ_section_comment
;
     ENTER TEXT
;
_publ_section_references
;
     ENTER OTHER REFERENCES

     Rigaku/MSC and Rigaku Corporation. (2001).
     CrystalStructure.
     Single Crystal Structure Analysis Software. Version 3.16.
     Rigaku/MSC, 9009 New Trails Drive, The Woodlands, TX, USA 77381-5209.
     Rigaku, 3-9-12 Akishima, Tokyo 196-8666, Japan.

     Watkin, D.J., Prout, C.K. Carruthers, J.R. & Betteridge, P.W. (1996)
     CRYSTALS Issue 10, Chemical Crystallography Laboratory, Oxford, UK.

;
_publ_section_figure_captions
;
     ENTER FIGURE CAPTIONS
;
_publ_section_exptl_prep
;
     ENTER COMPOUND PREPARATION DETAILS
;
_publ_section_exptl_refinement
;
     ENTER SPECIAL DETAILS OF THE REFINEMENT
;

#==============================================================================

data___biphepRh

#==============================================================================

# CHEMICAL DATA

_chemical_formula_sum                  'C44 H44 Cl2 F6 P2 Rh Sb '
_chemical_formula_moiety               'C44 H44 Cl2 F6 P2 Rh Sb '
_chemical_formula_weight               1044.33
_chemical_melting_point                ?

#==============================================================================

# CRYSTAL DATA
_symmetry_cell_setting                 monoclinic
_symmetry_space_group_name_H-M        'P 1 21/n 1'
_symmetry_Int_Tables_number            14
loop_
_symmetry_equiv_pos_as_xyz
  'x,y,z'
  '-x,-y,-z'
  '-x+1/2,y+1/2,-z+1/2'
  'x+1/2,-y+1/2,z+1/2'

#------------------------------------------------------------------------------

_cell_length_a                         14.065(4)
_cell_length_b                         13.737(4)
_cell_length_c                         21.407(6)
_cell_angle_alpha                      90
_cell_angle_beta                       97.789(4)
_cell_angle_gamma                      90
_cell_volume                           4097.9(21)
_cell_formula_units_Z                  4
_cell_measurement_reflns_used          16074
_cell_measurement_theta_min            2.4
_cell_measurement_theta_max            31.5
_cell_measurement_temperature          173.1

#------------------------------------------------------------------------------

_exptl_crystal_description            'prism'
_exptl_crystal_colour                 'red'
_exptl_crystal_size_max                0.20
_exptl_crystal_size_mid                0.20
_exptl_crystal_size_min                0.20
_exptl_crystal_density_diffrn          1.693
_exptl_crystal_density_meas            ?
_exptl_crystal_density_method         'not measured'
_exptl_crystal_F_000                   2088.00
_exptl_absorpt_coefficient_mu          1.328
_exptl_absorpt_correction_type         multi-scan
_exptl_absorpt_process_details
'Jacobson, R. (1998) Private communication'
_exptl_absorpt_correction_T_min        0.554
_exptl_absorpt_correction_T_max        0.767

#==============================================================================

# EXPERIMENTAL DATA

_diffrn_radiation_type                'Mo K\a'
_diffrn_radiation_wavelength           0.7107
_diffrn_measurement_device_type       'Rigaku Saturn'
_diffrn_measurement_method             \w
_diffrn_detector_area_resol_mean       7.31
_diffrn_reflns_number                  36865
_diffrn_reflns_av_R_equivalents        0.044
_diffrn_reflns_theta_max               31.37
_diffrn_measured_fraction_theta_max    0.8947
_diffrn_reflns_theta_full              31.37
_diffrn_measured_fraction_theta_full   0.8947
_diffrn_reflns_limit_h_min             -20
_diffrn_reflns_limit_h_max             19
_diffrn_reflns_limit_k_min             -19
_diffrn_reflns_limit_k_max             19
_diffrn_reflns_limit_l_min             -30
_diffrn_reflns_limit_l_max             21

#==============================================================================

# REFINEMENT DATA

_refine_special_details
;
     Refinement using reflections with F^2^ > 3.0 sigma(F^2^).
     The weighted R-factor (wR), goodness of fit (S) and R-factor (gt) are
     based on F, with F set to zero for negative F. The threshold expression of
     F^2^ > 2.0 sigma(F^2^) is used only for calculating R-factor (gt).
;
_reflns_number_total                   12097
_reflns_number_gt                      11726
_reflns_threshold_expression           F^2^>2.0\s(F^2^)
_refine_ls_structure_factor_coef       F
_refine_ls_R_factor_gt                 0.0620
_refine_ls_wR_factor_ref               0.0810
_refine_ls_hydrogen_treatment          refall
_refine_ls_number_reflns               11726
_refine_ls_number_parameters           543
_refine_ls_goodness_of_fit_ref         1.000
_refine_ls_weighting_scheme            calc
_refine_ls_weighting_details
'w = 1/[0.0000Fo^2^ + 2.0000\s^2^(Fo) + 0.3790]'
_refine_ls_shift/su_max                0.0400
_refine_diff_density_max               1.09
_refine_diff_density_min               -0.91
_refine_ls_extinction_method           none
_refine_ls_extinction_coef             ?

loop_
_atom_type_symbol
_atom_type_description
_atom_type_scat_dispersion_real
_atom_type_scat_dispersion_imag
_atom_type_scat_source
   'C' 'C'  0.003 0.002
;
International Tables for Crystallography
(1992, Vol. C, Tables 4.2.6.8 and 6.1.1.4)
;
   'H' 'H'  0.000 0.000
;
International Tables for Crystallography
(1992, Vol. C, Table 6.1.1.4)
;
   'F' 'F'  0.017 0.010
;
International Tables for Crystallography
(1992, Vol. C, Tables 4.2.6.8 and 6.1.1.4)
;
   'P' 'P'  0.102 0.094
;
International Tables for Crystallography
(1992, Vol. C, Tables 4.2.6.8 and 6.1.1.4)
;
   'Rh' 'Rh'  -1.118 0.919
;
International Tables for Crystallography
(1992, Vol. C, Tables 4.2.6.8 and 6.1.1.4)
;
   'Sb' 'Sb'  -0.587 1.546
;
International Tables for Crystallography
(1992, Vol. C, Tables 4.2.6.8 and 6.1.1.4)
;
   'Cl' 'Cl'  0.148 0.159
;
International Tables for Crystallography
(1992, Vol. C, Tables 4.2.6.8 and 6.1.1.4)
;

#==============================================================================

# ATOMIC COORDINATES AND THERMAL PARAMETERS

loop_
_atom_site_label
_atom_site_type_symbol
_atom_site_fract_x
_atom_site_fract_y
_atom_site_fract_z
_atom_site_U_iso_or_equiv
_atom_site_adp_type
_atom_site_occupancy
_atom_site_symmetry_multiplicity
_atom_site_calc_flag
_atom_site_refinement_flags
_atom_site_disorder_assembly
_atom_site_disorder_group
  Sb(1)  Sb 1.05859(3)  0.58320(3)  0.79480(2)  0.02631(9)  Uani 1.00 1 d . . .
  Rh(1)  Rh 0.76844(3)  0.32373(3)  0.66589(2)  0.01770(9)  Uani 1.00 1 d . . .
  Cl(1)  Cl 0.6776(2)   0.6150(2)   0.17069(10) 0.0529(6)   Uani 1.00 1 d . . .
  Cl(2)  Cl 0.4776(2)   0.6121(2)   0.1108(2)   0.0679(7)   Uani 1.00 1 d . . .
  P(3)   P  0.85764(9)  0.26307(9)  0.59225(6)  0.0166(3)   Uani 1.00 1 d . . .
  P(4)   P  0.66513(9)  0.40292(9)  0.58954(6)  0.0170(3)   Uani 1.00 1 d . . .
  F(1)   F  1.1724(3)   0.5623(3)   0.7603(2)   0.0435(11)  Uani 1.00 1 d . . .
  F(2)   F  0.9885(3)   0.5571(4)   0.7155(2)   0.0516(13)  Uani 1.00 1 d . . .
  F(3)   F  0.9438(4)   0.6057(5)   0.8276(3)   0.068(2)    Uani 1.00 1 d . . .
  F(4)   F  1.1288(4)   0.6117(5)   0.8727(2)   0.073(2)    Uani 1.00 1 d . . .
  F(5)   F  1.0628(4)   0.7142(3)   0.7728(3)   0.058(2)    Uani 1.00 1 d . . .
  F(6)   F  1.0533(4)   0.4516(4)   0.8145(3)   0.067(2)    Uani 1.00 1 d . . .
  C(1)   C  0.8567(3)   0.3254(4)   0.5166(2)   0.0176(10)  Uani 1.00 1 d . . .
  C(2)   C  0.9392(4)   0.3697(4)   0.5001(3)   0.0232(12)  Uani 1.00 1 d . . .
  C(3)   C  0.9388(4)   0.4167(4)   0.4430(3)   0.0262(13)  Uani 1.00 1 d . . .
  C(4)   C  0.8561(4)   0.4170(4)   0.3992(3)   0.0274(13)  Uani 1.00 1 d . . .
  C(5)   C  0.7748(4)   0.3713(4)   0.4142(3)   0.0252(12)  Uani 1.00 1 d . . .
  C(6)   C  0.7716(3)   0.3277(4)   0.4728(2)   0.0191(11)  Uani 1.00 1 d . . .
  C(7)   C  0.6178(3)   0.3202(4)   0.5259(2)   0.0194(11)  Uani 1.00 1 d . . .
  C(8)   C  0.5251(4)   0.2825(4)   0.5239(3)   0.0253(13)  Uani 1.00 1 d . . .
  C(9)   C  0.4926(4)   0.2081(5)   0.4825(3)   0.033(2)    Uani 1.00 1 d . . .
  C(10)  C  0.5511(5)   0.1699(5)   0.4423(3)   0.035(2)    Uani 1.00 1 d . . .
  C(11)  C  0.6413(4)   0.2090(4)   0.4414(3)   0.0247(12)  Uani 1.00 1 d . . .
  C(12)  C  0.6771(4)   0.2837(4)   0.4822(2)   0.0203(11)  Uani 1.00 1 d . . .
  C(13)  C  0.9845(4)   0.2532(4)   0.6243(2)   0.0199(11)  Uani 1.00 1 d . . .
  C(14)  C  1.0319(4)   0.3370(4)   0.6477(3)   0.0256(12)  Uani 1.00 1 d . . .
  C(15)  C  1.1275(4)   0.3339(5)   0.6751(3)   0.030(1)    Uani 1.00 1 d . . .
  C(16)  C  1.1756(4)   0.2459(5)   0.6793(3)   0.035(2)    Uani 1.00 1 d . . .
  C(17)  C  1.1290(4)   0.1623(4)   0.6566(3)   0.031(1)    Uani 1.00 1 d . . .
  C(18)  C  1.0336(4)   0.1657(4)   0.6290(3)   0.0248(12)  Uani 1.00 1 d . . .
  C(19)  C  0.8169(4)   0.1422(4)   0.5658(2)   0.0202(11)  Uani 1.00 1 d . . .
  C(20)  C  0.8579(4)   0.0954(4)   0.5188(3)   0.0251(12)  Uani 1.00 1 d . . .
  C(21)  C  0.8195(5)   0.0083(4)   0.4932(3)   0.032(2)    Uani 1.00 1 d . . .
  C(22)  C  0.7386(5)   -0.0306(5)  0.5147(3)   0.037(2)    Uani 1.00 1 d . . .
  C(23)  C  0.6982(5)   0.0148(5)   0.5613(3)   0.035(2)    Uani 1.00 1 d . . .
  C(24)  C  0.7374(4)   0.1008(4)   0.5876(3)   0.0250(12)  Uani 1.00 1 d . . .
  C(25)  C  0.5628(3)   0.4569(4)   0.6221(2)   0.0197(11)  Uani 1.00 1 d . . .
  C(26)  C  0.5525(4)   0.5580(4)   0.6253(3)   0.0256(13)  Uani 1.00 1 d . . .
  C(27)  C  0.4849(4)   0.5983(5)   0.6594(3)   0.031(1)    Uani 1.00 1 d . . .
  C(28)  C  0.4268(5)   0.5396(5)   0.6895(3)   0.032(2)    Uani 1.00 1 d . . .
  C(29)  C  0.4344(4)   0.4399(6)   0.6860(3)   0.034(2)    Uani 1.00 1 d . . .
  C(30)  C  0.5021(4)   0.3986(4)   0.6525(3)   0.0228(12)  Uani 1.00 1 d . . .
  C(31)  C  0.7178(4)   0.5067(4)   0.5544(3)   0.0212(11)  Uani 1.00 1 d . . .
  C(32)  C  0.7929(4)   0.5567(4)   0.5906(3)   0.0261(13)  Uani 1.00 1 d . . .
  C(33)  C  0.8296(4)   0.6413(5)   0.5683(4)   0.034(2)    Uani 1.00 1 d . . .
  C(34)  C  0.7938(5)   0.6759(5)   0.5089(4)   0.038(2)    Uani 1.00 1 d . . .
  C(35)  C  0.7210(5)   0.6262(5)   0.4722(3)   0.036(2)    Uani 1.00 1 d . . .
  C(36)  C  0.6815(4)   0.5427(4)   0.4944(3)   0.0263(13)  Uani 1.00 1 d . . .
  C(37)  C  0.8336(5)   0.2281(5)   0.7431(3)   0.031(1)    Uani 1.00 1 d . . .
  C(38)  C  0.8761(4)   0.3181(5)   0.7508(3)   0.029(1)    Uani 1.00 1 d . . .
  C(39)  C  0.8192(5)   0.3779(5)   0.7938(3)   0.031(1)    Uani 1.00 1 d . . .
  C(40)  C  0.7228(4)   0.3938(5)   0.7508(3)   0.028(1)    Uani 1.00 1 d . . .
  C(41)  C  0.6811(4)   0.3041(5)   0.7439(3)   0.030(1)    Uani 1.00 1 d . . .
  C(42)  C  0.7492(5)   0.2320(5)   0.7811(3)   0.032(2)    Uani 1.00 1 d . . .
  C(43)  C  0.7905(5)   0.2975(5)   0.8372(3)   0.035(2)    Uani 1.00 1 d . . .
  C(44)  C  0.5758(9)   0.6833(7)   0.1424(5)   0.072(3)    Uani 1.00 1 d . . .
  H(1)   H  0.9967(4)   0.3677(4)   0.5290(3)   0.028(2)    Uiso 1.00 1 c . . .
  H(2)   H  0.9952(4)   0.4483(4)   0.4335(3)   0.032(2)    Uiso 1.00 1 c . . .
  H(3)   H  0.8554(4)   0.4487(4)   0.3597(3)   0.033(2)    Uiso 1.00 1 c . . .
  H(4)   H  0.7192(4)   0.3691(4)   0.3837(3)   0.030(2)    Uiso 1.00 1 c . . .
  H(5)   H  0.4838(4)   0.3083(4)   0.5514(3)   0.030(2)    Uiso 1.00 1 c . . .
  H(6)   H  0.4294(4)   0.1836(5)   0.4821(3)   0.040(2)    Uiso 1.00 1 c . . .
  H(7)   H  0.5297(5)   0.1171(5)   0.4153(3)   0.042(2)    Uiso 1.00 1 c . . .
  H(8)   H  0.6804(4)   0.1843(4)   0.4122(3)   0.030(2)    Uiso 1.00 1 c . . .
  H(9)   H  0.9984(4)   0.3973(4)   0.6450(3)   0.030(2)    Uiso 1.00 1 c . . .
  H(10)  H  1.1593(4)   0.3917(5)   0.6907(3)   0.035(2)    Uiso 1.00 1 c . . .
  H(11)  H  1.2407(4)   0.2430(5)   0.6981(3)   0.040(2)    Uiso 1.00 1 c . . .
  H(12)  H  1.1626(4)   0.1021(4)   0.6593(3)   0.037(2)    Uiso 1.00 1 c . . .
  H(13)  H  1.0019(4)   0.1077(4)   0.6137(3)   0.029(2)    Uiso 1.00 1 c . . .
  H(14)  H  0.9124(4)   0.1231(4)   0.5038(3)   0.030(2)    Uiso 1.00 1 c . . .
  H(15)  H  0.8484(5)   -0.0245(4)  0.4615(3)   0.038(2)    Uiso 1.00 1 c . . .
  H(16)  H  0.7112(5)   -0.0891(5)  0.4967(3)   0.043(2)    Uiso 1.00 1 c . . .
  H(17)  H  0.6431(5)   -0.0124(5)  0.5759(3)   0.042(2)    Uiso 1.00 1 c . . .
  H(18)  H  0.7098(4)   0.1316(4)   0.6206(3)   0.031(2)    Uiso 1.00 1 c . . .
  H(19)  H  0.5919(4)   0.5990(4)   0.6040(3)   0.031(2)    Uiso 1.00 1 c . . .
  H(20)  H  0.4788(4)   0.6671(5)   0.6618(3)   0.036(2)    Uiso 1.00 1 c . . .
  H(21)  H  0.3812(5)   0.5677(5)   0.7131(3)   0.038(2)    Uiso 1.00 1 c . . .
  H(22)  H  0.3933(4)   0.3993(6)   0.7064(3)   0.042(2)    Uiso 1.00 1 c . . .
  H(23)  H  0.5072(4)   0.3298(4)   0.6501(3)   0.027(2)    Uiso 1.00 1 c . . .
  H(24)  H  0.8186(4)   0.5321(4)   0.6309(3)   0.031(2)    Uiso 1.00 1 c . . .
  H(25)  H  0.8794(4)   0.6756(5)   0.5936(4)   0.041(2)    Uiso 1.00 1 c . . .
  H(26)  H  0.8194(5)   0.7337(5)   0.4934(4)   0.047(2)    Uiso 1.00 1 c . . .
  H(27)  H  0.6975(5)   0.6499(5)   0.4313(3)   0.045(2)    Uiso 1.00 1 c . . .
  H(28)  H  0.6304(4)   0.5100(4)   0.4694(3)   0.032(2)    Uiso 1.00 1 c . . .
  H(29)  H  0.8498(5)   0.4338(5)   0.8134(3)   0.037(2)    Uiso 1.00 1 c . . .
  H(30)  H  0.7226(5)   0.1714(5)   0.7912(3)   0.038(2)    Uiso 1.00 1 c . . .
  H(31)  H  0.8436(5)   0.2692(5)   0.8630(3)   0.042(2)    Uiso 1.00 1 c . . .
  H(32)  H  0.7439(5)   0.3177(5)   0.8627(3)   0.042(2)    Uiso 1.00 1 c . . .
  H(33)  H  0.5578(9)   0.7208(7)   0.1762(5)   0.083(4)    Uiso 1.00 1 c . . .
  H(34)  H  0.5919(9)   0.7257(7)   0.1103(5)   0.083(4)    Uiso 1.00 1 c . . .
  H(35)  H  0.8677(5)   0.1702(5)   0.7363(3)   0.036(2)    Uiso 1.00 1 c . . .
  H(36)  H  0.9426(4)   0.3280(5)   0.7492(3)   0.035(2)    Uiso 1.00 1 c . . .
  H(37)  H  0.6135(4)   0.2949(5)   0.7368(3)   0.037(2)    Uiso 1.00 1 c . . .
  H(38)  H  0.6874(4)   0.4529(5)   0.7493(3)   0.035(2)    Uiso 1.00 1 c . . .


loop_
_atom_site_aniso_label
_atom_site_aniso_U_11
_atom_site_aniso_U_22
_atom_site_aniso_U_33
_atom_site_aniso_U_12
_atom_site_aniso_U_13
_atom_site_aniso_U_23
  Sb(1)  0.0275(2)   0.0285(2)   0.0233(2)   -0.0059(1)  0.00491(13) 0.0007(1)
  Rh(1)  0.0170(2)   0.0209(2)   0.0149(2)   0.00294(13) 0.00109(12) 
-0.00028(13)
  Cl(1)  0.0633(12)  0.0563(12)  0.0422(10)  -0.0040(10) 0.0187(9)   0.0008(8)
  Cl(2)  0.0554(13)  0.0456(11)  0.106(2)    -0.0036(10) 0.0214(13)  -0.0036(12)
  P(3)   0.0147(5)   0.0173(5)   0.0176(5)   0.0007(4)   0.0016(4)   0.0010(4)
  P(4)   0.0147(5)   0.0183(5)   0.0177(5)   0.0007(4)   0.0014(4)   0.0009(4)
  F(1)   0.030(2)    0.057(3)    0.046(2)    -0.002(2)   0.011(2)    -0.008(2)
  F(2)   0.043(2)    0.070(3)    0.037(2)    0.002(2)    -0.012(2)   -0.009(2)
  F(3)   0.049(3)    0.089(4)    0.073(4)    -0.006(3)   0.039(3)    -0.009(3)
  F(4)   0.074(4)    0.110(5)    0.032(2)    -0.018(4)   -0.007(2)   -0.013(3)
  F(5)   0.071(3)    0.027(2)    0.081(4)    0.000(2)    0.025(3)    0.005(2)
  F(6)   0.078(4)    0.039(3)    0.082(4)    -0.013(3)   0.006(3)    0.024(3)
  C(1)   0.017(2)    0.018(2)    0.018(2)    0.003(2)    0.004(2)    -0.003(2)
  C(2)   0.020(2)    0.022(2)    0.028(3)    -0.003(2)   0.007(2)    -0.001(2)
  C(3)   0.021(2)    0.027(3)    0.033(3)    -0.005(2)   0.012(2)    0.003(2)
  C(4)   0.030(3)    0.027(3)    0.027(3)    0.000(2)    0.009(2)    0.009(2)
  C(5)   0.025(3)    0.030(3)    0.020(2)    0.003(2)    0.002(2)    0.006(2)
  C(6)   0.015(2)    0.022(2)    0.021(2)    -0.000(2)   0.004(2)    0.000(2)
  C(7)   0.013(2)    0.026(2)    0.020(2)    -0.003(2)   0.003(2)    -0.001(2)
  C(8)   0.014(2)    0.034(3)    0.027(3)    -0.007(2)   0.002(2)    -0.000(2)
  C(9)   0.024(3)    0.037(3)    0.038(3)    -0.015(2)   0.006(2)    -0.008(3)
  C(10)  0.032(3)    0.040(3)    0.032(3)    -0.009(3)   0.002(2)    -0.012(3)
  C(11)  0.026(3)    0.029(3)    0.019(2)    -0.002(2)   0.005(2)    -0.005(2)
  C(12)  0.017(2)    0.024(2)    0.020(2)    -0.000(2)   0.002(2)    -0.000(2)
  C(13)  0.016(2)    0.020(2)    0.023(2)    0.006(2)    0.002(2)    0.003(2)
  C(14)  0.021(2)    0.022(2)    0.032(3)    0.001(2)    -0.002(2)   -0.001(2)
  C(15)  0.023(3)    0.028(3)    0.036(3)    -0.001(2)   -0.004(2)   0.001(2)
  C(16)  0.023(3)    0.036(3)    0.042(3)    0.008(2)    -0.007(2)   -0.000(3)
  C(17)  0.022(3)    0.025(3)    0.044(3)    0.008(2)    -0.003(2)   -0.006(2)
  C(18)  0.022(2)    0.022(2)    0.029(3)    0.005(2)    0.001(2)    0.000(2)
  C(19)  0.025(2)    0.019(2)    0.016(2)    0.000(2)    -0.001(2)   0.002(2)
  C(20)  0.029(3)    0.022(2)    0.024(2)    0.001(2)    0.002(2)    -0.002(2)
  C(21)  0.046(4)    0.023(3)    0.026(3)    -0.003(2)   0.006(2)    -0.008(2)
  C(22)  0.054(4)    0.024(3)    0.030(3)    -0.012(3)   -0.001(3)   -0.008(2)
  C(23)  0.044(4)    0.029(3)    0.033(3)    -0.017(3)   0.007(3)    0.003(2)
  C(24)  0.026(3)    0.027(3)    0.024(2)    -0.005(2)   0.007(2)    0.001(2)
  C(25)  0.013(2)    0.025(2)    0.020(2)    0.004(2)    -0.002(2)   0.002(2)
  C(26)  0.020(2)    0.030(3)    0.026(3)    0.004(2)    0.002(2)    -0.002(2)
  C(27)  0.030(3)    0.030(3)    0.031(3)    0.010(2)    0.001(2)    -0.010(2)
  C(28)  0.029(3)    0.039(3)    0.027(3)    0.012(3)    0.002(2)    -0.005(2)
  C(29)  0.021(3)    0.060(4)    0.024(3)    0.009(3)    0.011(2)    0.008(3)
  C(30)  0.023(2)    0.025(2)    0.021(2)    -0.001(2)   0.002(2)    0.006(2)
  C(31)  0.019(2)    0.021(2)    0.023(2)    0.002(2)    0.005(2)    0.001(2)
  C(32)  0.022(2)    0.023(2)    0.033(3)    -0.001(2)   0.003(2)    -0.007(2)
  C(33)  0.024(3)    0.025(3)    0.053(4)    -0.006(2)   0.012(3)    -0.010(3)
  C(34)  0.031(3)    0.023(3)    0.064(5)    -0.001(2)   0.021(3)    0.004(3)
  C(35)  0.034(3)    0.034(3)    0.043(4)    0.001(3)    0.013(3)    0.014(3)
  C(36)  0.025(3)    0.025(3)    0.028(3)    0.003(2)    0.004(2)    0.004(2)
  C(37)  0.038(3)    0.031(3)    0.020(2)    0.010(2)    -0.007(2)   0.003(2)
  C(38)  0.019(2)    0.048(4)    0.020(2)    0.002(2)    -0.001(2)   0.003(2)
  C(39)  0.038(3)    0.034(3)    0.021(3)    -0.005(3)   0.003(2)    -0.005(2)
  C(40)  0.031(3)    0.031(3)    0.025(3)    0.006(2)    0.011(2)    -0.003(2)
  C(41)  0.026(3)    0.046(4)    0.020(2)    -0.005(2)   0.008(2)    0.005(2)
  C(42)  0.041(3)    0.030(3)    0.023(3)    -0.008(3)   -0.002(2)   0.007(2)
  C(43)  0.042(4)    0.042(4)    0.021(3)    0.000(3)    0.002(2)    0.003(2)
  C(44)  0.108(9)    0.034(4)    0.064(6)    0.003(5)    -0.018(6)   -0.004(4)

#==============================================================================

_computing_data_collection            'CrystalClear'
_computing_cell_refinement            'CrystalClear'
_computing_data_reduction             'CrystalStructure'
_computing_structure_solution         'SIR92'
_computing_structure_refinement       'CRYSTALS'
_computing_publication_material       'CrystalStructure Ver. 3.16'
_computing_molecular_graphics          ?

#==============================================================================

# MOLECULAR GEOMETRY

_geom_special_details
;
     ENTER SPECIAL DETAILS OF THE MOLECULAR GEOMETRY
;

loop_
_geom_bond_atom_site_label_1
_geom_bond_atom_site_label_2
_geom_bond_distance
_geom_bond_publ_flag
_geom_bond_site_symmetry_1
_geom_bond_site_symmetry_2
Sb(1)     F(1)      1.874(4)    yes  . .
Sb(1)     F(2)      1.879(4)    yes  . .
Sb(1)     F(3)      1.871(6)    yes  . .
Sb(1)     F(4)      1.860(5)    yes  . .
Sb(1)     F(5)      1.864(5)    yes  . .
Sb(1)     F(6)      1.860(5)    yes  . .
Rh(1)     P(3)      2.300(1)    yes  . .
Rh(1)     P(4)      2.3070(13)  yes  . .
Rh(1)     C(37)     2.210(6)    yes  . .
Rh(1)     C(38)     2.204(5)    yes  . .
Rh(1)     C(40)     2.226(6)    yes  . .
Rh(1)     C(41)     2.220(6)    yes  . .
Cl(1)     C(44)     1.750(11)   yes  . .
Cl(2)     C(44)     1.753(11)   yes  . .
P(3)      C(1)      1.831(5)    yes  . .
P(3)      C(13)     1.828(5)    yes  . .
P(3)      C(19)     1.822(5)    yes  . .
P(4)      C(7)      1.829(5)    yes  . .
P(4)      C(25)     1.838(5)    yes  . .
P(4)      C(31)     1.817(6)    yes  . .
C(1)      C(2)      1.397(8)    yes  . .
C(1)      C(6)      1.417(6)    yes  . .
C(2)      C(3)      1.381(8)    yes  . .
C(2)      H(1)      0.950(7)    no   . .
C(3)      C(4)      1.392(8)    yes  . .
C(3)      H(2)      0.950(8)    no   . .
C(4)      C(5)      1.380(8)    yes  . .
C(4)      H(3)      0.950(9)    no   . .
C(5)      C(6)      1.394(8)    yes  . .
C(5)      H(4)      0.950(7)    no   . .
C(6)      C(12)     1.499(7)    yes  . .
C(7)      C(8)      1.398(7)    yes  . .
C(7)      C(12)     1.426(8)    yes  . .
C(8)      C(9)      1.388(9)    yes  . .
C(8)      H(5)      0.950(8)    no   . .
C(9)      C(10)     1.374(10)   yes  . .
C(9)      H(6)      0.950(9)    no   . .
C(10)     C(11)     1.380(9)    yes  . .
C(10)     H(7)      0.950(10)   no   . .
C(11)     C(12)     1.396(8)    yes  . .
C(11)     H(8)      0.950(8)    no   . .
C(13)     C(14)     1.389(7)    yes  . .
C(13)     C(18)     1.384(8)    yes  . .
C(14)     C(15)     1.392(8)    yes  . .
C(14)     H(9)      0.950(8)    no   . .
C(15)     C(16)     1.382(9)    yes  . .
C(15)     H(10)     0.950(9)    no   . .
C(16)     C(17)     1.378(9)    yes  . .
C(16)     H(11)     0.950(9)    no   . .
C(17)     C(18)     1.391(8)    yes  . .
C(17)     H(12)     0.950(9)    no   . .
C(18)     H(13)     0.950(8)    no   . .
C(19)     C(20)     1.384(8)    yes  . .
C(19)     C(24)     1.391(8)    yes  . .
C(20)     C(21)     1.394(8)    yes  . .
C(20)     H(14)     0.950(9)    no   . .
C(21)     C(22)     1.390(10)   yes  . .
C(21)     H(15)     0.950(9)    no   . .
C(22)     C(23)     1.366(10)   yes  . .
C(22)     H(16)     0.950(9)    no   . .
C(23)     C(24)     1.390(9)    yes  . .
C(23)     H(17)     0.950(10)   no   . .
C(24)     H(18)     0.950(8)    no   . .
C(25)     C(26)     1.399(8)    yes  . .
C(25)     C(30)     1.394(8)    yes  . .
C(26)     C(27)     1.389(9)    yes  . .
C(26)     H(19)     0.950(8)    no   . .
C(27)     C(28)     1.369(9)    yes  . .
C(27)     H(20)     0.950(9)    no   . .
C(28)     C(29)     1.377(10)   yes  . .
C(28)     H(21)     0.950(10)   no   . .
C(29)     C(30)     1.388(9)    yes  . .
C(29)     H(22)     0.950(10)   no   . .
C(30)     H(23)     0.950(8)    no   . .
C(31)     C(32)     1.402(7)    yes  . .
C(31)     C(36)     1.405(8)    yes  . .
C(32)     C(33)     1.383(9)    yes  . .
C(32)     H(24)     0.950(8)    no   . .
C(33)     C(34)     1.386(10)   yes  . .
C(33)     H(25)     0.950(9)    no   . .
C(34)     C(35)     1.384(9)    yes  . .
C(34)     H(26)     0.950(10)   no   . .
C(35)     C(36)     1.386(9)    yes  . .
C(35)     H(27)     0.950(10)   no   . .
C(36)     H(28)     0.950(8)    no   . .
C(37)     C(38)     1.373(9)    yes  . .
C(37)     C(42)     1.529(10)   yes  . .
C(37)     H(35)     0.950(9)    no   . .
C(38)     C(39)     1.538(9)    yes  . .
C(38)     H(36)     0.950(8)    no   . .
C(39)     C(40)     1.548(8)    yes  . .
C(39)     C(43)     1.531(9)    yes  . .
C(39)     H(29)     0.950(9)    no   . .
C(40)     C(41)     1.365(9)    yes  . .
C(40)     H(38)     0.950(9)    no   . .
C(41)     C(42)     1.525(9)    yes  . .
C(41)     H(37)     0.950(9)    no   . .
C(42)     C(43)     1.549(9)    yes  . .
C(42)     H(30)     0.950(9)    no   . .
C(43)     H(31)     0.950(9)    no   . .
C(43)     H(32)     0.950(10)   no   . .
C(44)     H(33)     0.95(2)     no   . .
C(44)     H(34)     0.95(2)     no   . .

loop_
_geom_angle_atom_site_label_1
_geom_angle_atom_site_label_2
_geom_angle_atom_site_label_3
_geom_angle
_geom_angle_publ_flag
_geom_angle_site_symmetry_1
_geom_angle_site_symmetry_2
_geom_angle_site_symmetry_3
F(1)      Sb(1)     F(2)      89.2(2)     yes   . . .
F(1)      Sb(1)     F(3)      178.7(2)    yes   . . .
F(1)      Sb(1)     F(4)      90.5(2)     yes   . . .
F(1)      Sb(1)     F(5)      89.4(2)     yes   . . .
F(1)      Sb(1)     F(6)      90.2(2)     yes   . . .
F(2)      Sb(1)     F(3)      89.8(2)     yes   . . .
F(2)      Sb(1)     F(4)      178.7(3)    yes   . . .
F(2)      Sb(1)     F(5)      89.2(2)     yes   . . .
F(2)      Sb(1)     F(6)      89.3(2)     yes   . . .
F(3)      Sb(1)     F(4)      90.5(3)     yes   . . .
F(3)      Sb(1)     F(5)      89.7(3)     yes   . . .
F(3)      Sb(1)     F(6)      90.7(3)     yes   . . .
F(4)      Sb(1)     F(5)      89.5(3)     yes   . . .
F(4)      Sb(1)     F(6)      92.0(3)     yes   . . .
F(5)      Sb(1)     F(6)      178.5(3)    yes   . . .
P(3)      Rh(1)     P(4)      92.00(5)    yes   . . .
P(3)      Rh(1)     C(37)     95.0(2)     yes   . . .
P(3)      Rh(1)     C(38)     100.1(2)    yes   . . .
P(3)      Rh(1)     C(40)     163.8(2)    yes   . . .
P(3)      Rh(1)     C(41)     151.7(2)    yes   . . .
P(4)      Rh(1)     C(37)     165.4(2)    yes   . . .
P(4)      Rh(1)     C(38)     153.8(2)    yes   . . .
P(4)      Rh(1)     C(40)     98.7(2)     yes   . . .
P(4)      Rh(1)     C(41)     103.3(2)    yes   . . .
C(37)     Rh(1)     C(38)     36.2(2)     yes   . . .
C(37)     Rh(1)     C(40)     77.5(2)     yes   . . .
C(37)     Rh(1)     C(41)     65.2(2)     yes   . . .
C(38)     Rh(1)     C(40)     65.4(2)     yes   . . .
C(38)     Rh(1)     C(41)     76.4(2)     yes   . . .
C(40)     Rh(1)     C(41)     35.8(2)     yes   . . .
C(1)      P(3)      C(13)     104.9(2)    yes   . . .
C(1)      P(3)      C(19)     100.8(2)    yes   . . .
C(1)      P(3)      Rh(1)     119.8(2)    yes   . . .
C(13)     P(3)      C(19)     107.4(2)    yes   . . .
C(13)     P(3)      Rh(1)     111.4(2)    yes   . . .
C(19)     P(3)      Rh(1)     111.5(2)    yes   . . .
C(7)      P(4)      C(25)     108.0(2)    yes   . . .
C(7)      P(4)      C(31)     107.8(2)    yes   . . .
C(7)      P(4)      Rh(1)     111.5(2)    yes   . . .
C(25)     P(4)      C(31)     103.0(3)    yes   . . .
C(25)     P(4)      Rh(1)     111.8(2)    yes   . . .
C(31)     P(4)      Rh(1)     114.2(2)    yes   . . .
C(2)      C(1)      C(6)      118.6(5)    yes   . . .
C(2)      C(1)      P(3)      121.4(4)    yes   . . .
C(6)      C(1)      P(3)      120.0(4)    yes   . . .
C(3)      C(2)      H(1)      119.4(7)    no    . . .
C(3)      C(2)      C(1)      121.6(5)    yes   . . .
H(1)      C(2)      C(1)      119.0(7)    no    . . .
C(4)      C(3)      H(2)      120.0(7)    no    . . .
C(4)      C(3)      C(2)      120.0(5)    yes   . . .
H(2)      C(3)      C(2)      120.0(6)    no    . . .
C(5)      C(4)      H(3)      120.5(6)    no    . . .
C(5)      C(4)      C(3)      119.0(5)    yes   . . .
H(3)      C(4)      C(3)      120.5(7)    no    . . .
C(6)      C(5)      H(4)      118.8(7)    no    . . .
C(6)      C(5)      C(4)      122.2(5)    yes   . . .
H(4)      C(5)      C(4)      119.0(7)    no    . . .
C(12)     C(6)      C(1)      125.9(5)    yes   . . .
C(12)     C(6)      C(5)      115.5(4)    yes   . . .
C(1)      C(6)      C(5)      118.5(5)    yes   . . .
C(8)      C(7)      C(12)     118.3(5)    yes   . . .
C(8)      C(7)      P(4)      119.8(4)    yes   . . .
C(12)     C(7)      P(4)      121.4(4)    yes   . . .
C(9)      C(8)      H(5)      119.6(6)    no    . . .
C(9)      C(8)      C(7)      121.2(6)    yes   . . .
H(5)      C(8)      C(7)      119.2(6)    no    . . .
C(10)     C(9)      H(6)      119.9(8)    no    . . .
C(10)     C(9)      C(8)      120.5(6)    yes   . . .
H(6)      C(9)      C(8)      119.6(8)    no    . . .
C(11)     C(10)     H(7)      120.4(8)    no    . . .
C(11)     C(10)     C(9)      119.3(6)    yes   . . .
H(7)      C(10)     C(9)      120.4(8)    no    . . .
C(12)     C(11)     H(8)      118.8(6)    no    . . .
C(12)     C(11)     C(10)     122.2(6)    yes   . . .
H(8)      C(11)     C(10)     119.0(7)    no    . . .
C(6)      C(12)     C(7)      123.7(5)    yes   . . .
C(6)      C(12)     C(11)     117.6(5)    yes   . . .
C(7)      C(12)     C(11)     118.4(5)    yes   . . .
C(14)     C(13)     C(18)     118.9(5)    yes   . . .
C(14)     C(13)     P(3)      118.1(4)    yes   . . .
C(18)     C(13)     P(3)      123.0(4)    yes   . . .
C(15)     C(14)     H(9)      119.7(6)    no    . . .
C(15)     C(14)     C(13)     121.0(5)    yes   . . .
H(9)      C(14)     C(13)     119.4(6)    no    . . .
C(16)     C(15)     H(10)     120.3(7)    no    . . .
C(16)     C(15)     C(14)     119.4(6)    yes   . . .
H(10)     C(15)     C(14)     120.3(7)    no    . . .
C(17)     C(16)     H(11)     120.0(8)    no    . . .
C(17)     C(16)     C(15)     120.0(6)    yes   . . .
H(11)     C(16)     C(15)     120.0(8)    no    . . .
C(18)     C(17)     H(12)     119.9(7)    no    . . .
C(18)     C(17)     C(16)     120.5(6)    yes   . . .
H(12)     C(17)     C(16)     119.6(7)    no    . . .
H(13)     C(18)     C(13)     119.8(6)    no    . . .
H(13)     C(18)     C(17)     120.0(6)    no    . . .
C(13)     C(18)     C(17)     120.2(5)    yes   . . .
C(20)     C(19)     C(24)     119.2(5)    yes   . . .
C(20)     C(19)     P(3)      120.3(4)    yes   . . .
C(24)     C(19)     P(3)      120.1(4)    yes   . . .
C(21)     C(20)     H(14)     119.9(7)    no    . . .
C(21)     C(20)     C(19)     120.4(6)    yes   . . .
H(14)     C(20)     C(19)     119.7(6)    no    . . .
C(22)     C(21)     H(15)     120.2(7)    no    . . .
C(22)     C(21)     C(20)     119.4(6)    yes   . . .
H(15)     C(21)     C(20)     120.4(8)    no    . . .
C(23)     C(22)     H(16)     119.7(9)    no    . . .
C(23)     C(22)     C(21)     120.5(6)    yes   . . .
H(16)     C(22)     C(21)     119.8(8)    no    . . .
C(24)     C(23)     H(17)     119.9(8)    no    . . .
C(24)     C(23)     C(22)     120.1(7)    yes   . . .
H(17)     C(23)     C(22)     119.9(8)    no    . . .
H(18)     C(24)     C(19)     119.7(6)    no    . . .
H(18)     C(24)     C(23)     120.0(7)    no    . . .
C(19)     C(24)     C(23)     120.3(6)    yes   . . .
C(26)     C(25)     C(30)     118.2(5)    yes   . . .
C(26)     C(25)     P(4)      120.8(4)    yes   . . .
C(30)     C(25)     P(4)      120.4(4)    yes   . . .
C(27)     C(26)     H(19)     120.1(7)    no    . . .
C(27)     C(26)     C(25)     120.3(5)    yes   . . .
H(19)     C(26)     C(25)     119.6(7)    no    . . .
C(28)     C(27)     H(20)     119.8(8)    no    . . .
C(28)     C(27)     C(26)     120.4(6)    yes   . . .
H(20)     C(27)     C(26)     119.7(7)    no    . . .
C(29)     C(28)     H(21)     119.7(8)    no    . . .
C(29)     C(28)     C(27)     120.3(6)    yes   . . .
H(21)     C(28)     C(27)     119.9(8)    no    . . .
C(30)     C(29)     H(22)     120.0(8)    no    . . .
C(30)     C(29)     C(28)     119.9(6)    yes   . . .
H(22)     C(29)     C(28)     120.2(8)    no    . . .
H(23)     C(30)     C(25)     119.4(7)    no    . . .
H(23)     C(30)     C(29)     119.8(7)    no    . . .
C(25)     C(30)     C(29)     120.8(6)    yes   . . .
C(32)     C(31)     C(36)     119.1(5)    yes   . . .
C(32)     C(31)     P(4)      118.3(4)    yes   . . .
C(36)     C(31)     P(4)      122.5(4)    yes   . . .
C(33)     C(32)     H(24)     119.9(7)    no    . . .
C(33)     C(32)     C(31)     120.6(6)    yes   . . .
H(24)     C(32)     C(31)     119.6(7)    no    . . .
C(34)     C(33)     H(25)     120.0(8)    no    . . .
C(34)     C(33)     C(32)     120.0(6)    yes   . . .
H(25)     C(33)     C(32)     120.0(8)    no    . . .
C(35)     C(34)     H(26)     120.1(9)    no    . . .
C(35)     C(34)     C(33)     120.0(6)    yes   . . .
H(26)     C(34)     C(33)     120.0(8)    no    . . .
C(36)     C(35)     H(27)     119.6(8)    no    . . .
C(36)     C(35)     C(34)     120.9(6)    yes   . . .
H(27)     C(35)     C(34)     119.5(8)    no    . . .
H(28)     C(36)     C(31)     120.1(7)    no    . . .
H(28)     C(36)     C(35)     120.4(7)    no    . . .
C(31)     C(36)     C(35)     119.5(5)    yes   . . .
C(38)     C(37)     C(42)     105.2(5)    yes   . . .
C(38)     C(37)     H(35)     123.5(8)    no    . . .
C(38)     C(37)     Rh(1)     71.6(3)     yes   . . .
C(42)     C(37)     H(35)     123.7(7)    no    . . .
C(42)     C(37)     Rh(1)     96.0(4)     yes   . . .
H(35)     C(37)     Rh(1)     123.4(6)    no    . . .
C(39)     C(38)     H(36)     122.6(7)    no    . . .
C(39)     C(38)     Rh(1)     96.9(4)     yes   . . .
C(39)     C(38)     C(37)     107.4(5)    yes   . . .
H(36)     C(38)     Rh(1)     122.4(6)    no    . . .
H(36)     C(38)     C(37)     122.7(8)    no    . . .
C(37)     C(38)     Rh(1)     72.1(3)     yes   . . .
C(40)     C(39)     C(43)     100.5(5)    yes   . . .
C(40)     C(39)     H(29)     117.2(7)    no    . . .
C(43)     C(39)     H(29)     117.1(7)    no    . . .
C(43)     C(39)     C(38)     100.4(5)    yes   . . .
H(29)     C(39)     C(38)     117.0(7)    no    . . .
C(38)     C(39)     C(40)     101.8(5)    yes   . . .
C(41)     C(40)     H(38)     123.5(7)    no    . . .
C(41)     C(40)     Rh(1)     71.9(4)     yes   . . .
C(41)     C(40)     C(39)     105.4(5)    yes   . . .
H(38)     C(40)     Rh(1)     123.4(6)    no    . . .
H(38)     C(40)     C(39)     123.5(7)    no    . . .
C(39)     C(40)     Rh(1)     95.6(4)     yes   . . .
C(42)     C(41)     H(37)     122.9(7)    no    . . .
C(42)     C(41)     Rh(1)     95.7(4)     yes   . . .
C(42)     C(41)     C(40)     107.4(5)    yes   . . .
H(37)     C(41)     Rh(1)     122.6(5)    no    . . .
H(37)     C(41)     C(40)     122.8(8)    no    . . .
C(40)     C(41)     Rh(1)     72.4(4)     yes   . . .
C(43)     C(42)     H(30)     116.8(7)    no    . . .
C(43)     C(42)     C(37)     101.3(5)    yes   . . .
C(43)     C(42)     C(41)     99.8(5)     yes   . . .
H(30)     C(42)     C(37)     116.7(7)    no    . . .
H(30)     C(42)     C(41)     116.7(7)    no    . . .
C(37)     C(42)     C(41)     102.9(5)    yes   . . .
H(31)     C(43)     H(32)     109.5(8)    no    . . .
H(31)     C(43)     C(39)     113.4(8)    no    . . .
H(31)     C(43)     C(42)     113.3(7)    no    . . .
H(32)     C(43)     C(39)     113.4(8)    no    . . .
H(32)     C(43)     C(42)     113.6(8)    no    . . .
C(39)     C(43)     C(42)     92.9(5)     yes   . . .
H(33)     C(44)     H(34)     109.5(12)   no    . . .
H(33)     C(44)     Cl(1)     108.5(11)   no    . . .
H(33)     C(44)     Cl(2)     108.5(12)   no    . . .
H(34)     C(44)     Cl(1)     108.4(12)   no    . . .
H(34)     C(44)     Cl(2)     108.4(11)   no    . . .
Cl(1)     C(44)     Cl(2)     113.5(5)    yes   . . .

loop_
_geom_torsion_atom_site_label_1
_geom_torsion_atom_site_label_2
_geom_torsion_atom_site_label_3
_geom_torsion_atom_site_label_4
_geom_torsion
_geom_torsion_publ_flag
_geom_torsion_site_symmetry_1
_geom_torsion_site_symmetry_2
_geom_torsion_site_symmetry_3
_geom_torsion_site_symmetry_4
P(4)      Rh(1)     P(3)      C(1)      23.8(2)     yes   . . . .
P(4)      Rh(1)     P(3)      C(13)     146.7(2)    yes   . . . .
P(4)      Rh(1)     P(3)      C(19)     -93.4(2)    yes   . . . .
C(37)     Rh(1)     P(3)      C(1)      -169.1(2)   yes   . . . .
C(37)     Rh(1)     P(3)      C(13)     -46.2(2)    yes   . . . .
C(37)     Rh(1)     P(3)      C(19)     73.7(2)     yes   . . . .
C(38)     Rh(1)     P(3)      C(1)      -132.8(2)   yes   . . . .
C(38)     Rh(1)     P(3)      C(13)     -10.0(2)    yes   . . . .
C(38)     Rh(1)     P(3)      C(19)     109.9(2)    yes   . . . .
C(40)     Rh(1)     P(3)      C(1)      -107.7(2)   yes   . . . .
C(40)     Rh(1)     P(3)      C(13)     15.2(3)     yes   . . . .
C(40)     Rh(1)     P(3)      C(19)     135.1(2)    yes   . . . .
C(41)     Rh(1)     P(3)      C(1)      147.3(2)    yes   . . . .
C(41)     Rh(1)     P(3)      C(13)     -89.8(2)    yes   . . . .
C(41)     Rh(1)     P(3)      C(19)     30.1(2)     yes   . . . .
P(3)      Rh(1)     P(4)      C(7)      52.1(2)     yes   . . . .
P(3)      Rh(1)     P(4)      C(25)     173.1(2)    yes   . . . .
P(3)      Rh(1)     P(4)      C(31)     -70.4(2)    yes   . . . .
C(37)     Rh(1)     P(4)      C(7)      -66.6(3)    yes   . . . .
C(37)     Rh(1)     P(4)      C(25)     54.4(3)     yes   . . . .
C(37)     Rh(1)     P(4)      C(31)     170.9(2)    yes   . . . .
C(38)     Rh(1)     P(4)      C(7)      169.9(2)    yes   . . . .
C(38)     Rh(1)     P(4)      C(25)     -69.1(2)    yes   . . . .
C(38)     Rh(1)     P(4)      C(31)     47.4(2)     yes   . . . .
C(40)     Rh(1)     P(4)      C(7)      -140.1(2)   yes   . . . .
C(40)     Rh(1)     P(4)      C(25)     -19.1(2)    yes   . . . .
C(40)     Rh(1)     P(4)      C(31)     97.4(2)     yes   . . . .
C(41)     Rh(1)     P(4)      C(7)      -103.9(2)   yes   . . . .
C(41)     Rh(1)     P(4)      C(25)     17.1(2)     yes   . . . .
C(41)     Rh(1)     P(4)      C(31)     133.5(2)    yes   . . . .
P(3)      Rh(1)     C(37)     C(38)     100.2(4)    yes   . . . .
P(3)      Rh(1)     C(37)     C(42)     -155.8(3)   yes   . . . .
P(3)      Rh(1)     C(37)     H(35)     -18.4(8)    no    . . . .
P(4)      Rh(1)     C(37)     C(38)     -141.5(5)   yes   . . . .
P(4)      Rh(1)     C(37)     C(42)     -37.5(9)    yes   . . . .
P(4)      Rh(1)     C(37)     H(35)     100.0(9)    no    . . . .
C(38)     Rh(1)     C(37)     C(42)     104.0(4)    yes   . . . .
C(38)     Rh(1)     C(37)     H(35)     -118.6(9)   no    . . . .
C(40)     Rh(1)     C(37)     C(38)     -65.3(3)    yes   . . . .
C(40)     Rh(1)     C(37)     C(42)     38.7(3)     yes   . . . .
C(40)     Rh(1)     C(37)     H(35)     176.1(8)    no    . . . .
C(41)     Rh(1)     C(37)     C(38)     -100.9(4)   yes   . . . .
C(41)     Rh(1)     C(37)     C(42)     3.1(3)      yes   . . . .
C(41)     Rh(1)     C(37)     H(35)     140.5(8)    no    . . . .
P(3)      Rh(1)     C(38)     C(37)     -84.7(4)    yes   . . . .
P(3)      Rh(1)     C(38)     C(39)     169.1(3)    yes   . . . .
P(3)      Rh(1)     C(38)     H(36)     33.1(8)     no    . . . .
P(4)      Rh(1)     C(38)     C(37)     159.1(3)    yes   . . . .
P(4)      Rh(1)     C(38)     C(39)     53.0(6)     yes   . . . .
P(4)      Rh(1)     C(38)     H(36)     -83.1(9)    no    . . . .
C(37)     Rh(1)     C(38)     C(39)     -106.1(5)   yes   . . . .
C(37)     Rh(1)     C(38)     H(36)     117.8(9)    no    . . . .
C(40)     Rh(1)     C(38)     C(37)     102.7(4)    yes   . . . .
C(40)     Rh(1)     C(38)     C(39)     -3.4(3)     yes   . . . .
C(40)     Rh(1)     C(38)     H(36)     -139.4(8)   no    . . . .
C(41)     Rh(1)     C(38)     C(37)     66.6(4)     yes   . . . .
C(41)     Rh(1)     C(38)     C(39)     -39.5(3)    yes   . . . .
C(41)     Rh(1)     C(38)     H(36)     -175.6(8)   no    . . . .
P(3)      Rh(1)     C(40)     C(39)     -24.1(8)    yes   . . . .
P(3)      Rh(1)     C(40)     C(41)     -128.4(5)   yes   . . . .
P(3)      Rh(1)     C(40)     H(38)     112.8(7)    no    . . . .
P(4)      Rh(1)     C(40)     C(39)     -154.8(3)   yes   . . . .
P(4)      Rh(1)     C(40)     C(41)     100.8(3)    yes   . . . .
P(4)      Rh(1)     C(40)     H(38)     -17.9(7)    no    . . . .
C(37)     Rh(1)     C(40)     C(39)     39.6(3)     yes   . . . .
C(37)     Rh(1)     C(40)     C(41)     -64.8(3)    yes   . . . .
C(37)     Rh(1)     C(40)     H(38)     176.5(7)    no    . . . .
C(38)     Rh(1)     C(40)     C(39)     3.3(3)      yes   . . . .
C(38)     Rh(1)     C(40)     C(41)     -101.0(3)   yes   . . . .
C(38)     Rh(1)     C(40)     H(38)     140.3(7)    no    . . . .
C(41)     Rh(1)     C(40)     C(39)     104.3(4)    yes   . . . .
C(41)     Rh(1)     C(40)     H(38)     -118.7(8)   no    . . . .
P(3)      Rh(1)     C(41)     C(40)     152.6(3)    yes   . . . .
P(3)      Rh(1)     C(41)     C(42)     46.1(5)     yes   . . . .
P(3)      Rh(1)     C(41)     H(37)     -89.2(8)    no    . . . .
P(4)      Rh(1)     C(41)     C(40)     -86.3(3)    yes   . . . .
P(4)      Rh(1)     C(41)     C(42)     167.2(3)    yes   . . . .
P(4)      Rh(1)     C(41)     H(37)     31.9(8)     no    . . . .
C(37)     Rh(1)     C(41)     C(40)     103.4(3)    yes   . . . .
C(37)     Rh(1)     C(41)     C(42)     -3.1(3)     yes   . . . .
C(37)     Rh(1)     C(41)     H(37)     -138.4(8)   no    . . . .
C(38)     Rh(1)     C(41)     C(40)     66.7(3)     yes   . . . .
C(38)     Rh(1)     C(41)     C(42)     -39.8(3)    yes   . . . .
C(38)     Rh(1)     C(41)     H(37)     -175.1(8)   no    . . . .
C(40)     Rh(1)     C(41)     C(42)     -106.5(4)   yes   . . . .
C(40)     Rh(1)     C(41)     H(37)     118.2(9)    no    . . . .
Rh(1)     P(3)      C(1)      C(2)      114.4(4)    yes   . . . .
Rh(1)     P(3)      C(1)      C(6)      -67.0(4)    yes   . . . .
C(13)     P(3)      C(1)      C(2)      -11.6(5)    yes   . . . .
C(13)     P(3)      C(1)      C(6)      167.0(4)    yes   . . . .
C(19)     P(3)      C(1)      C(2)      -123.1(4)   yes   . . . .
C(19)     P(3)      C(1)      C(6)      55.6(4)     yes   . . . .
Rh(1)     P(3)      C(13)     C(14)     -57.7(5)    yes   . . . .
Rh(1)     P(3)      C(13)     C(18)     119.1(5)    yes   . . . .
C(1)      P(3)      C(13)     C(14)     73.4(5)     yes   . . . .
C(1)      P(3)      C(13)     C(18)     -109.8(5)   yes   . . . .
C(19)     P(3)      C(13)     C(14)     180.0(72)   yes   . . . .
C(19)     P(3)      C(13)     C(18)     -3.2(5)     yes   . . . .
Rh(1)     P(3)      C(19)     C(20)     176.3(4)    yes   . . . .
Rh(1)     P(3)      C(19)     C(24)     3.4(5)      yes   . . . .
C(1)      P(3)      C(19)     C(20)     48.0(4)     yes   . . . .
C(1)      P(3)      C(19)     C(24)     -124.8(4)   yes   . . . .
C(13)     P(3)      C(19)     C(20)     -61.5(4)    yes   . . . .
C(13)     P(3)      C(19)     C(24)     125.7(4)    yes   . . . .
Rh(1)     P(4)      C(7)      C(8)      101.5(4)    yes   . . . .
Rh(1)     P(4)      C(7)      C(12)     -70.9(5)    yes   . . . .
C(25)     P(4)      C(7)      C(8)      -21.7(5)    yes   . . . .
C(25)     P(4)      C(7)      C(12)     165.9(4)    yes   . . . .
C(31)     P(4)      C(7)      C(8)      -132.4(4)   yes   . . . .
C(31)     P(4)      C(7)      C(12)     55.3(5)     yes   . . . .
Rh(1)     P(4)      C(25)     C(26)     112.3(4)    yes   . . . .
Rh(1)     P(4)      C(25)     C(30)     -58.1(4)    yes   . . . .
C(7)      P(4)      C(25)     C(26)     -124.7(4)   yes   . . . .
C(7)      P(4)      C(25)     C(30)     64.8(4)     yes   . . . .
C(31)     P(4)      C(25)     C(26)     -10.8(4)    yes   . . . .
C(31)     P(4)      C(25)     C(30)     178.7(4)    yes   . . . .
Rh(1)     P(4)      C(31)     C(32)     -27.8(5)    yes   . . . .
Rh(1)     P(4)      C(31)     C(36)     157.1(4)    yes   . . . .
C(7)      P(4)      C(31)     C(32)     -152.3(4)   yes   . . . .
C(7)      P(4)      C(31)     C(36)     32.6(5)     yes   . . . .
C(25)     P(4)      C(31)     C(32)     93.7(4)     yes   . . . .
C(25)     P(4)      C(31)     C(36)     -81.4(5)    yes   . . . .
P(3)      C(1)      C(2)      C(3)      179.9(62)   yes   . . . .
P(3)      C(1)      C(2)      H(1)      -0.5(9)     no    . . . .
C(6)      C(1)      C(2)      C(3)      1.2(8)      yes   . . . .
C(6)      C(1)      C(2)      H(1)      -179.2(6)   no    . . . .
P(3)      C(1)      C(6)      C(5)      -176.6(4)   yes   . . . .
P(3)      C(1)      C(6)      C(12)     0.9(8)      yes   . . . .
C(2)      C(1)      C(6)      C(5)      2.1(7)      yes   . . . .
C(2)      C(1)      C(6)      C(12)     179.6(5)    yes   . . . .
C(1)      C(2)      C(3)      C(4)      -2.8(9)     yes   . . . .
C(1)      C(2)      C(3)      H(2)      177.6(7)    no    . . . .
H(1)      C(2)      C(3)      C(4)      177.6(7)    no    . . . .
H(1)      C(2)      C(3)      H(2)      -2.0(11)    no    . . . .
C(2)      C(3)      C(4)      C(5)      1.0(9)      yes   . . . .
C(2)      C(3)      C(4)      H(3)      -179.5(7)   no    . . . .
H(2)      C(3)      C(4)      C(5)      -179.5(7)   no    . . . .
H(2)      C(3)      C(4)      H(3)      0.0(12)     no    . . . .
C(3)      C(4)      C(5)      C(6)      2.4(9)      yes   . . . .
C(3)      C(4)      C(5)      H(4)      -177.4(7)   no    . . . .
H(3)      C(4)      C(5)      C(6)      -177.1(7)   no    . . . .
H(3)      C(4)      C(5)      H(4)      3.1(12)     no    . . . .
C(4)      C(5)      C(6)      C(1)      -4.0(8)     yes   . . . .
C(4)      C(5)      C(6)      C(12)     178.3(5)    yes   . . . .
H(4)      C(5)      C(6)      C(1)      175.8(7)    no    . . . .
H(4)      C(5)      C(6)      C(12)     -1.9(9)     no    . . . .
C(1)      C(6)      C(12)     C(7)      69.6(7)     yes   . . . .
C(1)      C(6)      C(12)     C(11)     -117.0(6)   yes   . . . .
C(5)      C(6)      C(12)     C(7)      -112.9(6)   yes   . . . .
C(5)      C(6)      C(12)     C(11)     60.5(7)     yes   . . . .
P(4)      C(7)      C(8)      C(9)      -169.6(5)   yes   . . . .
P(4)      C(7)      C(8)      H(5)      10.3(9)     no    . . . .
C(12)     C(7)      C(8)      C(9)      3.0(8)      yes   . . . .
C(12)     C(7)      C(8)      H(5)      -177.2(7)   no    . . . .
P(4)      C(7)      C(12)     C(6)      -17.0(7)    yes   . . . .
P(4)      C(7)      C(12)     C(11)     169.7(4)    yes   . . . .
C(8)      C(7)      C(12)     C(6)      170.5(5)    yes   . . . .
C(8)      C(7)      C(12)     C(11)     -2.8(7)     yes   . . . .
C(7)      C(8)      C(9)      C(10)     -0.2(9)     yes   . . . .
C(7)      C(8)      C(9)      H(6)      179.8(72)   no    . . . .
H(5)      C(8)      C(9)      C(10)     179.9(88)   no    . . . .
H(5)      C(8)      C(9)      H(6)      -0.0(12)    no    . . . .
C(8)      C(9)      C(10)     C(11)     -2.7(10)    yes   . . . .
C(8)      C(9)      C(10)     H(7)      177.3(8)    no    . . . .
H(6)      C(9)      C(10)     C(11)     177.2(8)    no    . . . .
H(6)      C(9)      C(10)     H(7)      -2.8(13)    no    . . . .
C(9)      C(10)     C(11)     C(12)     2.9(9)      yes   . . . .
C(9)      C(10)     C(11)     H(8)      -177.2(7)   no    . . . .
H(7)      C(10)     C(11)     C(12)     -177.1(8)   no    . . . .
H(7)      C(10)     C(11)     H(8)      2.8(12)     no    . . . .
C(10)     C(11)     C(12)     C(6)      -173.8(5)   yes   . . . .
C(10)     C(11)     C(12)     C(7)      -0.1(8)     yes   . . . .
H(8)      C(11)     C(12)     C(6)      6.3(9)      no    . . . .
H(8)      C(11)     C(12)     C(7)      -180.0(88)  no    . . . .
P(3)      C(13)     C(14)     C(15)     177.5(5)    yes   . . . .
P(3)      C(13)     C(14)     H(9)      -2.5(10)    no    . . . .
C(18)     C(13)     C(14)     C(15)     0.5(9)      yes   . . . .
C(18)     C(13)     C(14)     H(9)      -179.5(7)   no    . . . .
P(3)      C(13)     C(18)     C(17)     -177.0(5)   yes   . . . .
P(3)      C(13)     C(18)     H(13)     2.5(10)     no    . . . .
C(14)     C(13)     C(18)     C(17)     -0.2(9)     yes   . . . .
C(14)     C(13)     C(18)     H(13)     179.3(7)    no    . . . .
C(13)     C(14)     C(15)     C(16)     -0.4(10)    yes   . . . .
C(13)     C(14)     C(15)     H(10)     179.7(51)   no    . . . .
H(9)      C(14)     C(15)     C(16)     179.6(8)    no    . . . .
H(9)      C(14)     C(15)     H(10)     -0.3(12)    no    . . . .
C(14)     C(15)     C(16)     C(17)     -0.0(10)    yes   . . . .
C(14)     C(15)     C(16)     H(11)     -179.6(36)  no    . . . .
H(10)     C(15)     C(16)     C(17)     179.9(62)   no    . . . .
H(10)     C(15)     C(16)     H(11)     0.2(13)     no    . . . .
C(15)     C(16)     C(17)     C(18)     0.3(11)     yes   . . . .
C(15)     C(16)     C(17)     H(12)     179.5(8)    no    . . . .
H(11)     C(16)     C(17)     C(18)     179.9(72)   no    . . . .
H(11)     C(16)     C(17)     H(12)     -0.9(14)    no    . . . .
C(16)     C(17)     C(18)     C(13)     -0.2(10)    yes   . . . .
C(16)     C(17)     C(18)     H(13)     -179.7(36)  no    . . . .
H(12)     C(17)     C(18)     C(13)     -179.3(8)   no    . . . .
H(12)     C(17)     C(18)     H(13)     1.2(13)     no    . . . .
P(3)      C(19)     C(20)     C(21)     -172.4(5)   yes   . . . .
P(3)      C(19)     C(20)     H(14)     7.5(9)      no    . . . .
C(24)     C(19)     C(20)     C(21)     0.5(8)      yes   . . . .
C(24)     C(19)     C(20)     H(14)     -179.7(6)   no    . . . .
P(3)      C(19)     C(24)     C(23)     171.2(5)    yes   . . . .
P(3)      C(19)     C(24)     H(18)     -8.6(9)     no    . . . .
C(20)     C(19)     C(24)     C(23)     -1.7(8)     yes   . . . .
C(20)     C(19)     C(24)     H(18)     178.5(6)    no    . . . .
C(19)     C(20)     C(21)     C(22)     1.0(9)      yes   . . . .
C(19)     C(20)     C(21)     H(15)     -178.7(7)   no    . . . .
H(14)     C(20)     C(21)     C(22)     -178.8(7)   no    . . . .
H(14)     C(20)     C(21)     H(15)     1.5(11)     no    . . . .
C(20)     C(21)     C(22)     C(23)     -1.4(9)     yes   . . . .
C(20)     C(21)     C(22)     H(16)     178.5(8)    no    . . . .
H(15)     C(21)     C(22)     C(23)     178.3(7)    no    . . . .
H(15)     C(21)     C(22)     H(16)     -1.8(12)    no    . . . .
C(21)     C(22)     C(23)     C(24)     0.3(10)     yes   . . . .
C(21)     C(22)     C(23)     H(17)     -179.7(8)   no    . . . .
H(16)     C(22)     C(23)     C(24)     -179.6(8)   no    . . . .
H(16)     C(22)     C(23)     H(17)     0.4(13)     no    . . . .
C(22)     C(23)     C(24)     C(19)     1.3(9)      yes   . . . .
C(22)     C(23)     C(24)     H(18)     -178.9(7)   no    . . . .
H(17)     C(23)     C(24)     C(19)     -178.8(7)   no    . . . .
H(17)     C(23)     C(24)     H(18)     1.0(11)     no    . . . .
P(4)      C(25)     C(26)     C(27)     -169.0(5)   yes   . . . .
P(4)      C(25)     C(26)     H(19)     11.1(8)     no    . . . .
C(30)     C(25)     C(26)     C(27)     1.6(8)      yes   . . . .
C(30)     C(25)     C(26)     H(19)     -178.2(6)   no    . . . .
P(4)      C(25)     C(30)     C(29)     169.5(4)    yes   . . . .
P(4)      C(25)     C(30)     H(23)     -10.6(8)    no    . . . .
C(26)     C(25)     C(30)     C(29)     -1.2(7)     yes   . . . .
C(26)     C(25)     C(30)     H(23)     178.7(6)    no    . . . .
C(25)     C(26)     C(27)     C(28)     -1.0(8)     yes   . . . .
C(25)     C(26)     C(27)     H(20)     179.3(7)    no    . . . .
H(19)     C(26)     C(27)     C(28)     178.9(7)    no    . . . .
H(19)     C(26)     C(27)     H(20)     -0.8(11)    no    . . . .
C(26)     C(27)     C(28)     C(29)     -0.2(9)     yes   . . . .
C(26)     C(27)     C(28)     H(21)     179.4(7)    no    . . . .
H(20)     C(27)     C(28)     C(29)     179.5(7)    no    . . . .
H(20)     C(27)     C(28)     H(21)     -0.9(11)    no    . . . .
C(27)     C(28)     C(29)     C(30)     0.7(9)      yes   . . . .
C(27)     C(28)     C(29)     H(22)     -179.0(7)   no    . . . .
H(21)     C(28)     C(29)     C(30)     -178.9(7)   no    . . . .
H(21)     C(28)     C(29)     H(22)     1.4(11)     no    . . . .
C(28)     C(29)     C(30)     C(25)     -0.0(8)     yes   . . . .
C(28)     C(29)     C(30)     H(23)     -179.9(72)  no    . . . .
H(22)     C(29)     C(30)     C(25)     179.7(36)   no    . . . .
H(22)     C(29)     C(30)     H(23)     -0.1(10)    no    . . . .
P(4)      C(31)     C(32)     C(33)     -174.1(5)   yes   . . . .
P(4)      C(31)     C(32)     H(24)     5.9(9)      no    . . . .
C(36)     C(31)     C(32)     C(33)     1.2(9)      yes   . . . .
C(36)     C(31)     C(32)     H(24)     -178.8(7)   no    . . . .
P(4)      C(31)     C(36)     C(35)     175.6(5)    yes   . . . .
P(4)      C(31)     C(36)     H(28)     -4.5(10)    no    . . . .
C(32)     C(31)     C(36)     C(35)     0.5(9)      yes   . . . .
C(32)     C(31)     C(36)     H(28)     -179.6(7)   no    . . . .
C(31)     C(32)     C(33)     C(34)     -1.6(10)    yes   . . . .
C(31)     C(32)     C(33)     H(25)     178.5(8)    no    . . . .
H(24)     C(32)     C(33)     C(34)     178.4(8)    no    . . . .
H(24)     C(32)     C(33)     H(25)     -1.5(12)    no    . . . .
C(32)     C(33)     C(34)     C(35)     0.4(11)     yes   . . . .
C(32)     C(33)     C(34)     H(26)     -179.5(9)   no    . . . .
H(25)     C(33)     C(34)     C(35)     -179.7(36)  no    . . . .
H(25)     C(33)     C(34)     H(26)     0.4(14)     no    . . . .
C(33)     C(34)     C(35)     C(36)     1.3(11)     yes   . . . .
C(33)     C(34)     C(35)     H(27)     -179.1(9)   no    . . . .
H(26)     C(34)     C(35)     C(36)     -178.8(8)   no    . . . .
H(26)     C(34)     C(35)     H(27)     0.8(14)     no    . . . .
C(34)     C(35)     C(36)     C(31)     -1.8(10)    yes   . . . .
C(34)     C(35)     C(36)     H(28)     178.3(8)    no    . . . .
H(27)     C(35)     C(36)     C(31)     178.7(8)    no    . . . .
H(27)     C(35)     C(36)     H(28)     -1.2(13)    no    . . . .
Rh(1)     C(37)     C(38)     C(39)     91.8(4)     yes   . . . .
Rh(1)     C(37)     C(38)     H(36)     -117.6(7)   no    . . . .
C(42)     C(37)     C(38)     Rh(1)     -91.3(4)    yes   . . . .
C(42)     C(37)     C(38)     C(39)     0.4(6)      yes   . . . .
C(42)     C(37)     C(38)     H(36)     151.1(7)    no    . . . .
H(35)     C(37)     C(38)     Rh(1)     118.4(7)    no    . . . .
H(35)     C(37)     C(38)     C(39)     -149.9(7)   no    . . . .
H(35)     C(37)     C(38)     H(36)     0.8(11)     no    . . . .
Rh(1)     C(37)     C(42)     C(41)     -4.2(5)     yes   . . . .
Rh(1)     C(37)     C(42)     C(43)     -107.2(4)   yes   . . . .
Rh(1)     C(37)     C(42)     H(30)     124.9(7)    no    . . . .
C(38)     C(37)     C(42)     C(41)     68.3(6)     yes   . . . .
C(38)     C(37)     C(42)     C(43)     -34.6(6)    yes   . . . .
C(38)     C(37)     C(42)     H(30)     -162.6(7)   no    . . . .
H(35)     C(37)     C(42)     C(41)     -141.4(7)   no    . . . .
H(35)     C(37)     C(42)     C(43)     115.6(8)    no    . . . .
H(35)     C(37)     C(42)     H(30)     -12.3(11)   no    . . . .
Rh(1)     C(38)     C(39)     C(40)     4.5(5)      yes   . . . .
Rh(1)     C(38)     C(39)     C(43)     107.6(4)    yes   . . . .
Rh(1)     C(38)     C(39)     H(29)     -124.6(7)   no    . . . .
C(37)     C(38)     C(39)     C(40)     -68.9(6)    yes   . . . .
C(37)     C(38)     C(39)     C(43)     34.3(6)     yes   . . . .
C(37)     C(38)     C(39)     H(29)     162.1(7)    no    . . . .
H(36)     C(38)     C(39)     C(40)     140.5(8)    no    . . . .
H(36)     C(38)     C(39)     C(43)     -116.4(8)   no    . . . .
H(36)     C(38)     C(39)     H(29)     11.4(11)    no    . . . .
C(38)     C(39)     C(40)     Rh(1)     -4.5(5)     yes   . . . .
C(38)     C(39)     C(40)     C(41)     68.3(6)     yes   . . . .
C(38)     C(39)     C(40)     H(38)     -141.3(8)   no    . . . .
C(43)     C(39)     C(40)     Rh(1)     -107.5(4)   yes   . . . .
C(43)     C(39)     C(40)     C(41)     -34.7(6)    yes   . . . .
C(43)     C(39)     C(40)     H(38)     115.7(8)    no    . . . .
H(29)     C(39)     C(40)     Rh(1)     124.5(7)    no    . . . .
H(29)     C(39)     C(40)     C(41)     -162.7(8)   no    . . . .
H(29)     C(39)     C(40)     H(38)     -12.3(12)   no    . . . .
C(38)     C(39)     C(43)     C(42)     -51.4(5)    yes   . . . .
C(38)     C(39)     C(43)     H(31)     65.6(8)     no    . . . .
C(38)     C(39)     C(43)     H(32)     -168.7(7)   no    . . . .
C(40)     C(39)     C(43)     C(42)     52.7(6)     yes   . . . .
C(40)     C(39)     C(43)     H(31)     169.8(7)    no    . . . .
C(40)     C(39)     C(43)     H(32)     -64.5(8)    no    . . . .
H(29)     C(39)     C(43)     C(42)     -179.2(8)   no    . . . .
H(29)     C(39)     C(43)     H(31)     -62.2(11)   no    . . . .
H(29)     C(39)     C(43)     H(32)     63.5(11)    no    . . . .
Rh(1)     C(40)     C(41)     C(42)     90.5(5)     yes   . . . .
Rh(1)     C(40)     C(41)     H(37)     -117.9(8)   no    . . . .
C(39)     C(40)     C(41)     Rh(1)     -91.0(4)    yes   . . . .
C(39)     C(40)     C(41)     C(42)     -0.5(7)     yes   . . . .
C(39)     C(40)     C(41)     H(37)     151.1(7)    no    . . . .
H(38)     C(40)     C(41)     Rh(1)     118.6(8)    no    . . . .
H(38)     C(40)     C(41)     C(42)     -150.9(7)   no    . . . .
H(38)     C(40)     C(41)     H(37)     0.7(12)     no    . . . .
Rh(1)     C(41)     C(42)     C(37)     4.2(5)      yes   . . . .
Rh(1)     C(41)     C(42)     C(43)     108.3(5)    yes   . . . .
Rh(1)     C(41)     C(42)     H(30)     -124.9(7)   no    . . . .
C(40)     C(41)     C(42)     C(37)     -69.1(6)    yes   . . . .
C(40)     C(41)     C(42)     C(43)     35.0(7)     yes   . . . .
C(40)     C(41)     C(42)     H(30)     161.8(7)    no    . . . .
H(37)     C(41)     C(42)     C(37)     139.3(8)    no    . . . .
H(37)     C(41)     C(42)     C(43)     -116.6(8)   no    . . . .
H(37)     C(41)     C(42)     H(30)     10.2(12)    no    . . . .
C(37)     C(42)     C(43)     C(39)     52.6(6)     yes   . . . .
C(37)     C(42)     C(43)     H(31)     -64.5(9)    no    . . . .
C(37)     C(42)     C(43)     H(32)     169.8(7)    no    . . . .
C(41)     C(42)     C(43)     C(39)     -52.8(6)    yes   . . . .
C(41)     C(42)     C(43)     H(31)     -169.9(8)   no    . . . .
C(41)     C(42)     C(43)     H(32)     64.3(8)     no    . . . .
H(30)     C(42)     C(43)     C(39)     -179.5(8)   no    . . . .
H(30)     C(42)     C(43)     H(31)     63.4(11)    no    . . . .
H(30)     C(42)     C(43)     H(32)     -62.4(11)   no    . . . .

loop_
_geom_contact_atom_site_label_1
_geom_contact_atom_site_label_2
_geom_contact_distance
_geom_contact_publ_flag
_geom_contact_site_symmetry_1
_geom_contact_site_symmetry_2
Cl(1)     H(8)      3.001(6)    no    . 65502
Cl(1)     H(15)     3.396(6)    no    . 65502
Cl(2)     H(14)     3.075(7)    no    . 65502
Cl(2)     H(15)     3.596(7)    no    . 65502
F(1)      H(21)     3.234(8)    no    . 65501
F(2)      H(33)     3.346(11)   no    . 56504
F(4)      C(22)     3.406(8)    yes   . 55504
F(4)      H(16)     2.768(8)    no    . 55504
F(4)      H(27)     3.593(10)   no    . 56504
F(5)      C(44)     3.154(12)   yes   . 56504
F(5)      H(33)     2.245(12)   no    . 56504
F(6)      C(10)     3.208(9)    yes   . 55504
F(6)      C(11)     3.588(8)    yes   . 55504
F(6)      H(7)      2.419(9)    no    . 55504
F(6)      H(8)      3.169(8)    no    . 55504
C(21)     Cl(2)     3.535(7)    yes   . 55504
C(34)     H(16)     3.429(9)    no    . 56501
C(43)     H(6)      3.445(9)    no    . 55504
C(44)     C(4)      3.499(11)   yes   . 65502
C(44)     H(14)     3.261(12)   no    . 65502
H(12)     Cl(1)     2.998(7)    no    . 55504
H(13)     Cl(2)     3.038(6)    no    . 55504
H(25)     Cl(2)     3.227(7)    no    . 56504
H(25)     C(44)     3.421(13)   no    . 56504
H(26)     C(22)     3.481(9)    no    . 56501
H(31)     C(9)      3.095(9)    no    . 55504
H(31)     C(10)     3.279(9)    no    . 55504
H(33)     C(4)      3.445(12)   no    . 65502
H(34)     C(1)      3.211(12)   no    . 65502
H(34)     C(2)      3.067(11)   no    . 65502
H(34)     C(3)      2.870(11)   no    . 65502
H(34)     C(4)      2.743(11)   no    . 65502
H(34)     C(5)      2.838(12)   no    . 65502
H(34)     C(6)      3.120(13)   no    . 65502
H(34)     C(20)     3.444(12)   no    . 65502

#==============================================================================

# Additional structures and associated data_? identifiers
# should be added at this point if there is more than one
# structure analysis in the CIF.

#==============================================================================

#     End of CIF

#==============================================================================
